# Supplementary material for: Soybean miR159-GmMYB33 Regulatory Network Involved in Gibberellin-Modulated Resistance to Heterodera glycines
Source: MDPI journal article supplement (doi:10.3390/ijms222313172), 2021-12-06
Supplement: s1 [file s1]

**Table S1.** gma-miR159 family members described in miRbase

| miRNA name  | Location                | Strand | Mature sequence-5p   | Mature sequence-3p    |
|-------------|-------------------------|--------|----------------------|-----------------------|
| gma-miR159a | chr9: 40266722-40266935 | +      | gagcuccuugaaguccaaug | uuuggauugaagggagcucua |
| gma-miR159b | chr7: 5424789-5424974   | -      | gaguuccugcacuccaaguc | auuggagugaagggagcucca |
| gma-miR159c | chr16: 2830034-2830218  | -      |                      | auuggagugaagggagcuccg |
| gma-miR159d | chr9:40267067-40267127  | +      | agcugcuuagcuauggauc  |                       |
| gma-miR159e | chr7: 9561934-9562144   | -      | gagcuccuugaaguccaaau | uuuggauugaagggagcucua |
| gma-miR159f | chr16: 2819636-2819815  | -      | gaguuccugcacuccaaguc | auuggagugaagggagcucca |

**Table S2.** Primers used in this research.

| Gene name |                       |                                                    |
|-----------|-----------------------|----------------------------------------------------|
| 5'-RACE   | GmMYB33a RT primer    | TGGAAATTGGGTGGTGAGTGCTTC                           |
|           | GmMYB33a inner primer | GCCTTTCAAGCTTTTCGAGTTGTGGAC<br>TATCGCTTCCAGC       |
|           | GmMYB33a outer primer | CTGAAGCAGCAGATTGACCAAAGGGG<br>GAATTTGGCTCCCC       |
|           | GmMYB33b RT primer    | GGTGCTTCATGCTTATCATCATGATCC                        |
|           | GmMYB33b inner primer | CGCTTCTAGCAAACCACTGCTTTGTGG<br>AGAAATGGGATCTG      |
|           | GmMYB33b outer primer | CCTAAGGGGGAATTTGGATCGCCTAGT<br>TCATCCCATTCTGTC     |
|           | GmMYB33f RT primer    | GGTCTGAAGTGGTAGCTGTTCTGTTTC                        |
|           | GmMYB33f inner primer | GTCTTTGCTGATAAAGTAAAGCATCC<br>AGCAGGCCAC           |
|           | GmMYB33f outer primer | GCAGAGCTGTCAGCTCTGTCACCAGG<br>GGTTGC               |
|           | GmMYB33e RT primer    | CTGGACGAGTAATATTCAACAGGGAC                         |
|           | GmMYB33e outer primer | CTCGTACACATTCAAAAATAGAGCTGTC<br>AGCTCTGTCAACCAGGGG |
|           | GmMYB33e inner primer | CCGTTCAATGAATTTGCATTGGCTCTA<br>AGAGCTGGGCACTC      |
|           | GmMYB33d RT primer    | GGATTGAAGTTGCTCCAAAGGGAG                           |
|           | GmMYB33d inner primer | GCATCAAGCAAGCCACTATTAAGTGG<br>TGAAGAAGAACCCGAGTC   |
|           | GmMYB33d outer primer | CAAAGCAGAACTCAGCTCTGTCCG<br>CAGGAG                 |
| 5'-RACE   | GmMYB33c RT primer    | GAATGCAATCTCTCATTGTTGCCAC                          |
|           | GmMYB33c inner primer | GTGGTGAAGAACCTGAGTCTAGTGCA<br>TTAGGTGGTTGAGG       |
|           | GmMYB33c outer primer | AGCAGAACTCTCAGCTCTGTCAACCAG<br>GAGTTGC             |
| Gene name |                       | Forward                                            |
|           |                       | Reverse                                            |

|                |                                                                                                                  |                                                                                  |
|----------------|------------------------------------------------------------------------------------------------------------------|----------------------------------------------------------------------------------|
| Gene cloning   | pre-miR159a                                                                                                      | TAAGCAGGCGCGCCGAGGTTTCATGGT TAAGCACCTAGGAGGGTGTAGAGCTC<br>CTTGGTGCTTTG CCTTCAATC |
|                | pre-miR159b                                                                                                      | TAAGCAGGCGCGCCGAATACCCTCTG TAAGCACCTAGGAAACCCAAGTTGGA<br>GAGCTCCCTTC GTTCCTG     |
|                | pre-miR159c                                                                                                      | TAAGCAGGCGCGCCAAGGCCTAATTC TAAGCACCTAGGACCCAAGTTGGAGC<br>GGAGCTCCC TCTCTACAC     |
|                | pre-miR159e                                                                                                      | TAAGCAGGCGCGCCACAAAAGGGGA TAAGCACCTAGGCAAAGGGGTTATG<br>GAAGGGTGTAGAG GAGTGGAGC   |
|                | pre-miR159f                                                                                                      | TAAGCAGGCGCGCCACCCTCTGGAGC TAAGCACCTAGGACCCAAGTTGGAGT<br>TCCCTT TCCCTGC          |
|                | Gene name                                                                                                        | Forward Reverse                                                                  |
| qRT-PCR        | U6                                                                                                               | GGAACGATACAGAGAAGATTAGCA TTTGGACCATTTCTCGAT                                      |
|                | pre-miR159a                                                                                                      | GAAGTGGAGCTCCTTGAAGTCC Universal                                                 |
|                | pre-miR159b                                                                                                      | GGAGTTCCTGCACTCCAAGT Universal                                                   |
|                | pre-miR159c                                                                                                      | GGAGCTCTCTACACTCCAAGTCT Universal                                                |
|                | pre-miR159e                                                                                                      | CAAAGGGGGTTATGGAGTGGAGC Universal                                                |
|                | pre-miR159f                                                                                                      | ACCCAAGTTGGAGTTCCTGTC Universal                                                  |
|                | miR159a/e-5p                                                                                                     | CAGGAGCTCCTTGAAGTC Universal                                                     |
|                | miR159a/e-3p                                                                                                     | GCGCAGTTTGGATTGAAG Universal                                                     |
|                | miR159b/f/-5p                                                                                                    | GAGTCCCTGCACTCCA Universal                                                       |
|                | miR159b/f/-3p/c                                                                                                  | GCGCAGATTGGAGTGAAG Universal                                                     |
|                | GmMYB33b                                                                                                         | CTCGGGAGTCAGAAATGCTATAC CAACCCAGGATGGTCAGAAA                                     |
|                | GmMYB33f                                                                                                         | TGCTCGAGTCAGTTGATGATTT CATCCAGCAGGCCACTATTT                                      |
|                | GmMYB33e                                                                                                         | GCAGAAGAGGAGCGGCTGATTG CTGTCCGACCAGGCAAAATGAGC                                   |
|                | GmMYB33d                                                                                                         | CTGCGATGGGCCAATCACCTAAG TGGCGTGGAGTTCAGCAATCATC                                  |
|                | GmMYB33c                                                                                                         | GGAACAAAATGGGCACGCATGG CTCGGGAGGATAAAGTGGCAAGC                                   |
|                | GmMYB33a                                                                                                         | AGACAGTTCAGGAAGAAA ACTTCCATACTCGGTGCTATTC                                        |
|                | GmUBI-3                                                                                                          | GTGTAATGTTGGATGTGTTCCC ACACAATTGAGTTCAACACAAACCG                                 |
| STTM-miR159    |                                                                                                                  |                                                                                  |
| miR159a/e-3p   | GGCGCGCCGTAGAGCTCCCTCTATCAATCCAAAGTTGTTGTTATGGTCTAATTTAAATATGGTCT<br>AAAGAAGAAGAATTAGAGCTCCCTCTATCAATCCAAACCTAGG |                                                                                  |
| miR159b/f-3p/c | GGCGCGCCTGGAGCTCCCTCTATCACTCCAATGTTGTTGTTATGGTCTAATTTAAATATGGTCTA<br>AAGAAGAAGAATTGGAGCTCCCTCTATCACTCCAATCCTAGG  |                                                                                  |

Note: red characters indicate restriction enzyme sites.

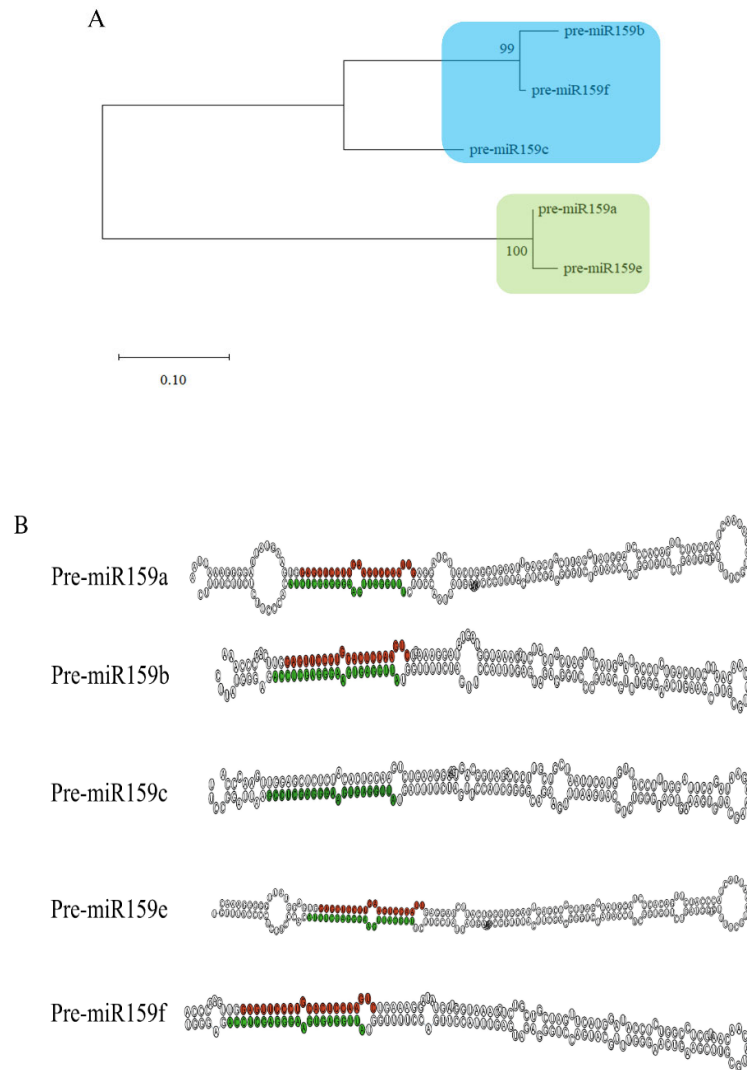

**Figure S1.** The soybean MIR159 gene family. A. Phylogenetic analysis of gma-miR159 family. Multiple sequences alignments were generated with Clustal W, using default parameters in MEGAX. Phylogenetic analysis was performed in MEGAX using bootstrapped Maximum Likelihood (ML) estimation with 1000 bootstrap replications. B. The stem-loop structures of precursors of gma-miR159 family members. miR159-5p and miR159-3p are colored with red and green. The sequences of precursors of gma-miR159 were downloaded from miRbase and folded by using RNAfold wrapper in TBtools.

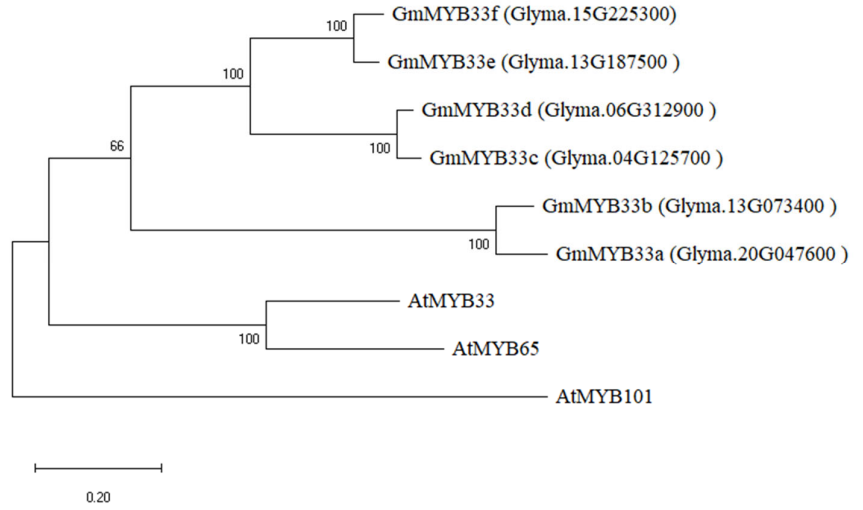

**Figure S2.** Phylogenetic analysis of soybean miR159 target *GAMYB* genes. The protein sequences of *GAMYB* genes were downloaded from Soybase and used for multiple sequences alignments with MUSCLE wrapper. Phylogenetic analysis was performed in MEGAX using bootstrapped Maximum Likelihood (ML) estimation with 1000 bootstrap replications.

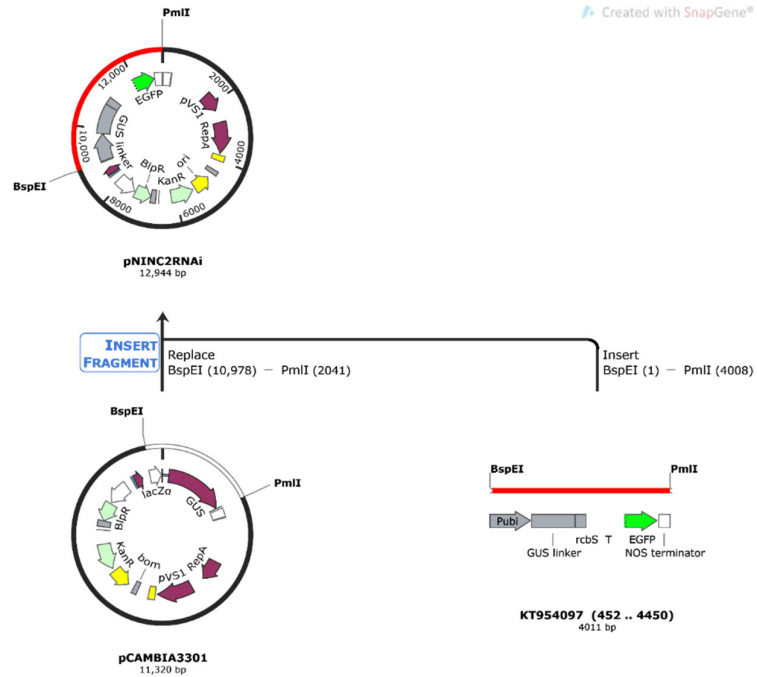

**Figure S3.** Schematic diagram of construction of pNINC2RNAi plasmid. The expression part of pG2RNAi2 (GenBank: KT954097, from 452th to 4450th nucleotide, 5' end flanked with BspE I and 3' end flanked with Pml I restriction enzyme sites) that contains *Gmubi* promotor, GUS( $\beta$ -glucuronidase) linker, *rcbS* terminator and an EGFP (enhanced Green Fluorescent Protein) expression cassette, then, the synthesis part was inserted into pCMBIA3301 by restriction digest clone. The new binary plasmid was named pNINC2RNAi.

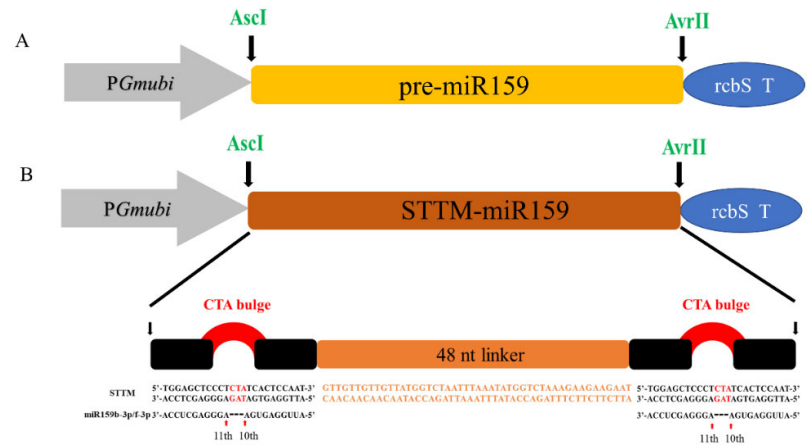

**Figure S4.** Schematic diagram of gene cassette used for the overexpression and silencing of miR159 in soybean hairy roots. A, schematic diagram of overexpressing pre-miR159, B, schematic diagram of silencing miR159, STTM159 consists of two short identical sequences that mimic miR159 target sites with a three additional nucleotides CTA bulge corresponding to the positions 10 to 11 of the miRNA159. Two short identical sequences were linked with 48 nt linker, mature miR159b-3p/f-3p sequence was used as example. PGmubi, Gmubi promoter, rcbS T, rcbS terminator, Asc I, Avr II indicate the Asc I and Avr II restriction enzyme sites, respectively.

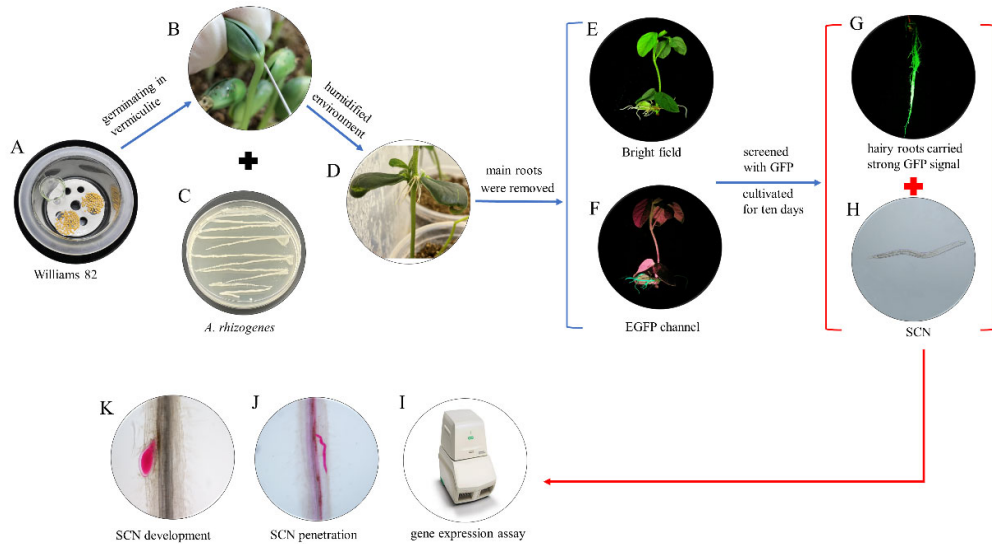

**Figure S6.** Generation of transgenic soybean hairy roots and SCN development on gene overexpressing and silencing hairy roots. A, soybean cultivar Williams 82 seeds, B, Williams 82 seedlings, C, *Agrobacterium rhizogenes* contained overexpressing and silencing plasmids, D, hairy roots started to sprout from the site of infection of *Agrobacterium rhizogenes*, E, bright field of transgenic soybean hairy roots, F, EGFP channel of transgenic soybean hairy roots, G, hairy roots carried with strong GFP signal, H, freshly hatched SCN juveniles, I, gene expression level assay with CFX Connect Real-Time PCR Detection System (Bio-Rad, CA, USA), J, K, SCN juveniles penetrate and develop in hairy roots, respectively.

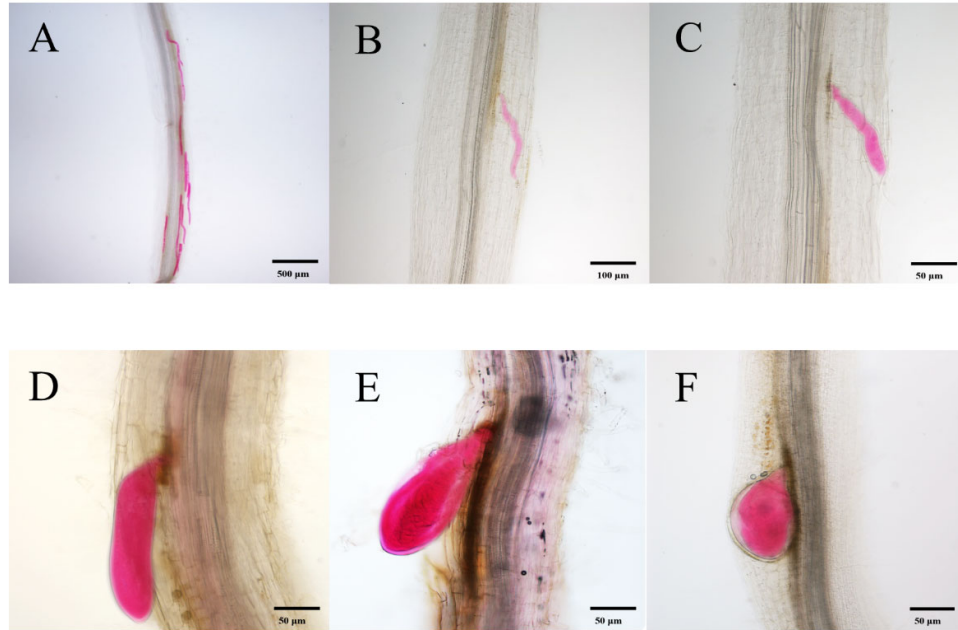

**Figure S6.** Different stage juveniles of soybean cyst nematode in soybean root. A: Second-stage juvenile, B: Swollen second-stage juvenile, C: Third-stage juvenile, D: Fourth-stage juvenile, E: Young female, F: Adult Female. Due to the progression from late J2 to the third-stage juvenile (J3), fourth-stage juvenile (J4) and to adult females is very rapid in the soybean roots, which makes it difficult to distinguish the late J2 stage from J3/J4 and the J4 from early female stage by using a stereo microscope. To evaluate the nematode development in a very consistent manner, we applied a three-grade scoring system consisting of the second-stage juvenile (veriform-J2, A), swollen juveniles (swollen J2/J3/J4, B, C, D), young females (E) and mature females (F).
